# Supplementary material for: Modular co-assembly of peptides and polyoxometalates into underwater adhesives with photoluminescence and adjustable adhesion
Source: Royal Society of Chemistry journal article supplement (doi:10.1039/d3sm01151h), 2023-01-01
Supplement: d3sm01151h1.pdf [file d3sm01151h1.pdf]

## Supplementary Information

### Modular co-assembly of peptides and polyoxometalates into underwater adhesives with photoluminescence and adjustable adhesion

Xinyan Wang, Yiwen Li, Junlian Nie, Guang Wen and Wen Li\*

State Key Laboratory of Supramolecular Structure and Materials, College of Chemistry, Jilin University, Qianjin Avenue 2699, Changchun, 130012, China.

E-mail: wenli@jlu.edu.cn

#### 1, Preparation of the single peptide/POM composite.

**Pep1/SiW<sub>9</sub>V<sub>3</sub>:** Pep1 (112.64 mg) was dissolved in 0.35 ml of deionized water to form an aqueous solution (pH ~ 6.0). Then SiW<sub>9</sub>V<sub>3</sub> solution (316 mg of SiW<sub>9</sub>V<sub>3</sub> dissolved in 0.25 ml of deionized water), was mixed with the peptide solution at 25 °C. The charge ratio of SiW<sub>9</sub>V<sub>3</sub> to Pep1 was 4:3, and the final pH value of the mixed solution was controlled at about 6.0. The resulting turbid solution with orange-red appearance was heated to 65 °C with ultrasonication, followed by cooling down to 25 °C for 5 min, giving rise to the formation of an orange-red stiff solid. Elemental analysis (EA) revealed that the lyophilized Pep1/SiW<sub>9</sub>V<sub>3</sub> solid powder possessed 17.17% C, 5.24% N, and 3.02% H. Thermogravimetric analysis (TGA) showed a mass loss of 4.85% from 25 to 183.2°C arising from crystal water. Combining EA and TGA, Pep1/SiW<sub>9</sub>V<sub>3</sub> should correspond to a tentative formula: [H<sub>2</sub>(C<sub>19</sub>H<sub>29</sub>N<sub>5</sub>O<sub>3</sub>)]<sub>2.7~2.8</sub>K<sub>0.6~1.4</sub>[SiW<sub>9</sub>V<sub>3</sub>O<sub>40</sub>]<sub>8~11</sub>(H<sub>2</sub>O).

**Pep2/SiW<sub>9</sub>V<sub>3</sub>:** Pep2 (102.11 mg) was dissolved in 0.35 ml of deionized water to form an aqueous solution (pH ~ 6.0). Then SiW<sub>9</sub>V<sub>3</sub> solution (316 mg of SiW<sub>9</sub>V<sub>3</sub> dissolved in 0.25 ml of deionized water), was mixed with the peptide solution at 25 °C. The charge ratio of SiW<sub>9</sub>V<sub>3</sub> to Pep2 was 4:3, and the final pH value of the mixed solution was controlled at about 6.0. The resulting turbid solution with orange-red appearance was heated to 65 °C with ultrasonication, followed by cooling down to 25 °C for 5 min, giving rise to the formation of a fluid coacervate with orange-red appearance. Elemental analysis (EA) revealed that the lyophilized Pep2/SiW<sub>9</sub>V<sub>3</sub> coacervate powder possessed 13.26% C, 6.58% N, and 2.82% H. Thermogravimetric analysis (TGA) showed a mass loss of 5.00% from 25 to 179.1°C arising from crystal water. Combining EA and TGA, Pep2/SiW<sub>9</sub>V<sub>3</sub> should correspond to a tentative formula: [H<sub>2</sub>(C<sub>14</sub>H<sub>26</sub>N<sub>6</sub>O<sub>4</sub>)]<sub>2.8</sub>K<sub>0.4~1.4</sub>[SiW<sub>9</sub>V<sub>3</sub>O<sub>40</sub>]<sub>9~10</sub>(H<sub>2</sub>O).

## 2, Characteristic.

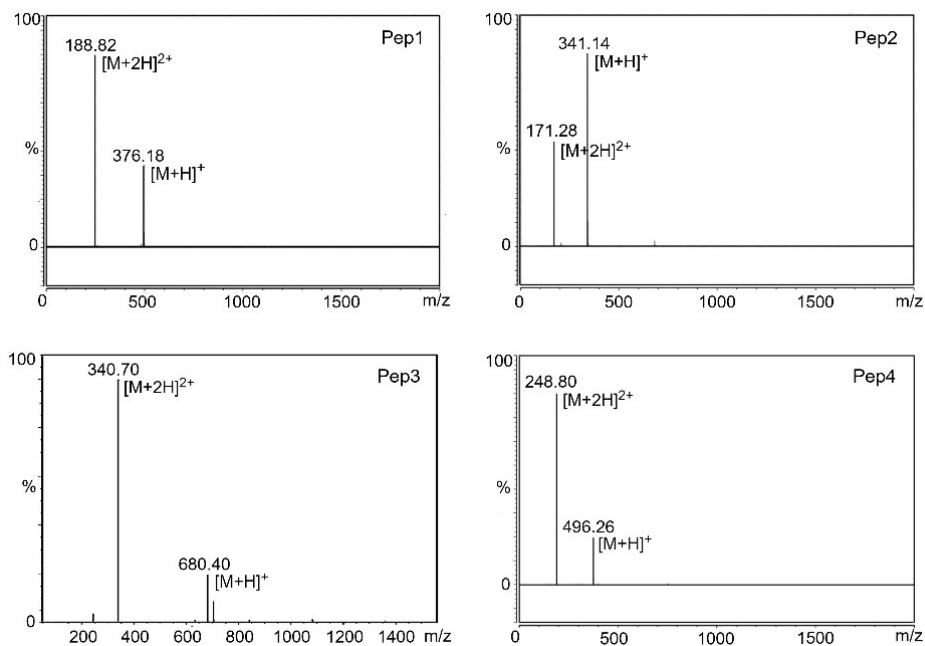

Fig. S1 ESI-MS spectra of the short peptides.

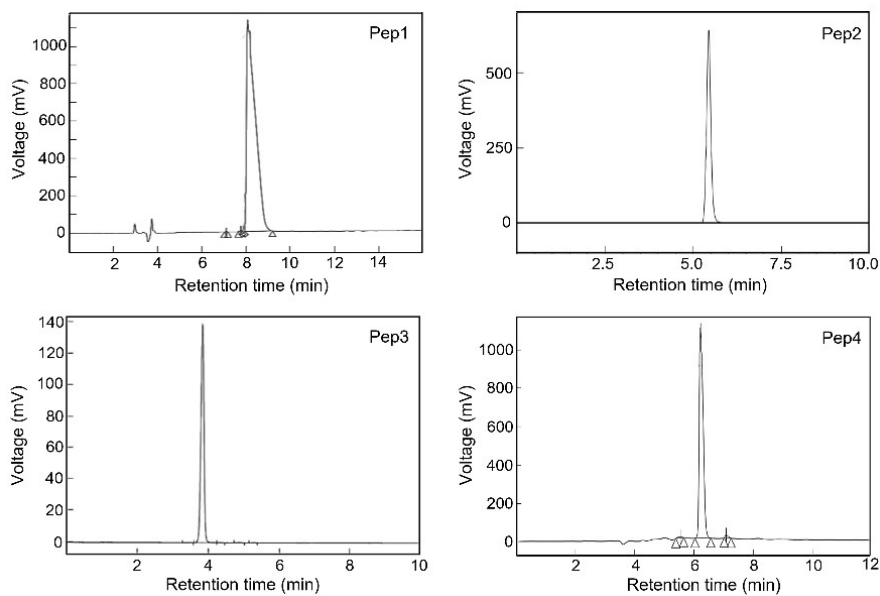

Fig. S2 HPLC curves of the short peptides.

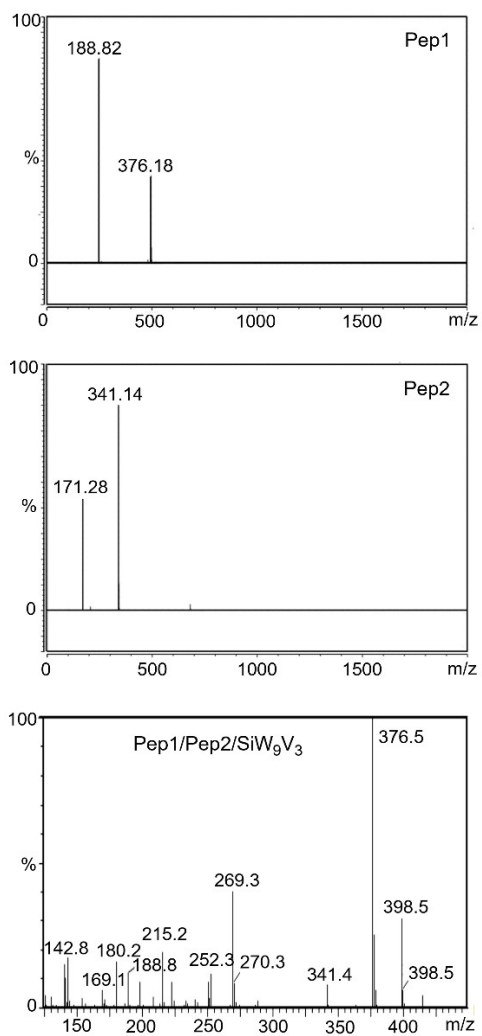

**Fig. S3** ESI-MS spectra of Pep1, Pep2 and Pep1/Pep2/SiW<sub>9</sub>V<sub>3</sub> adhesive.

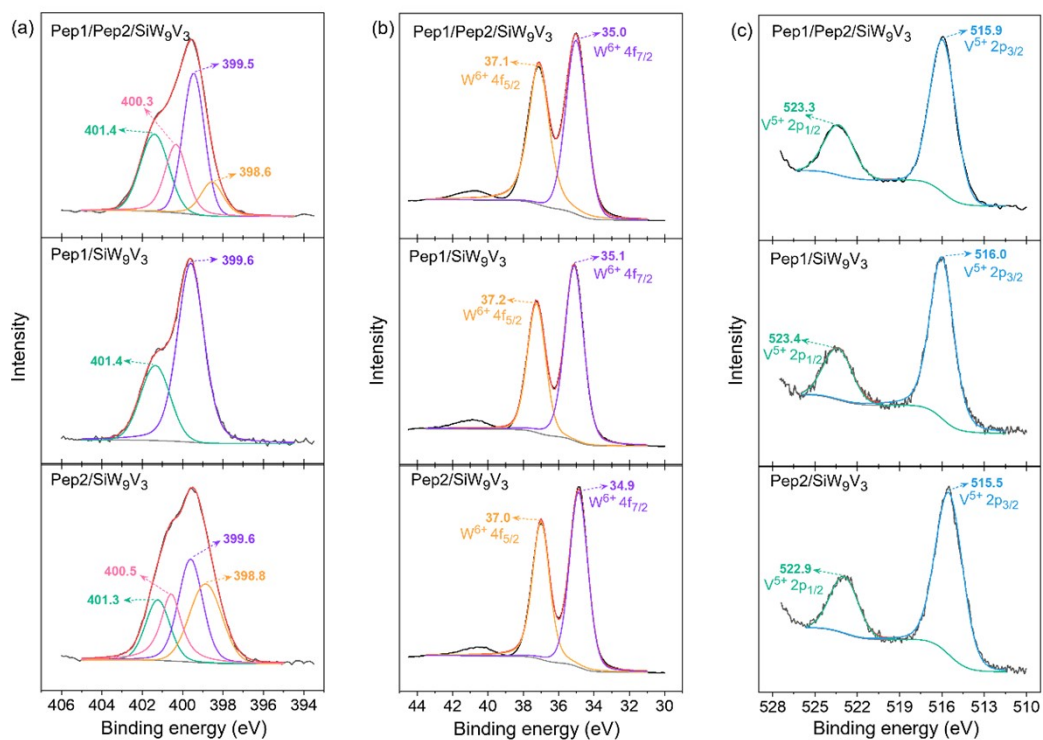

**Fig. S4** XPS spectra of Pep1/Pep2/SiW<sub>9</sub>V<sub>3</sub>, Pep1/SiW<sub>9</sub>V<sub>3</sub> and Pep2/SiW<sub>9</sub>V<sub>3</sub>: (a) N 1s level, (b) W 4f level, and (c) V 2p level.

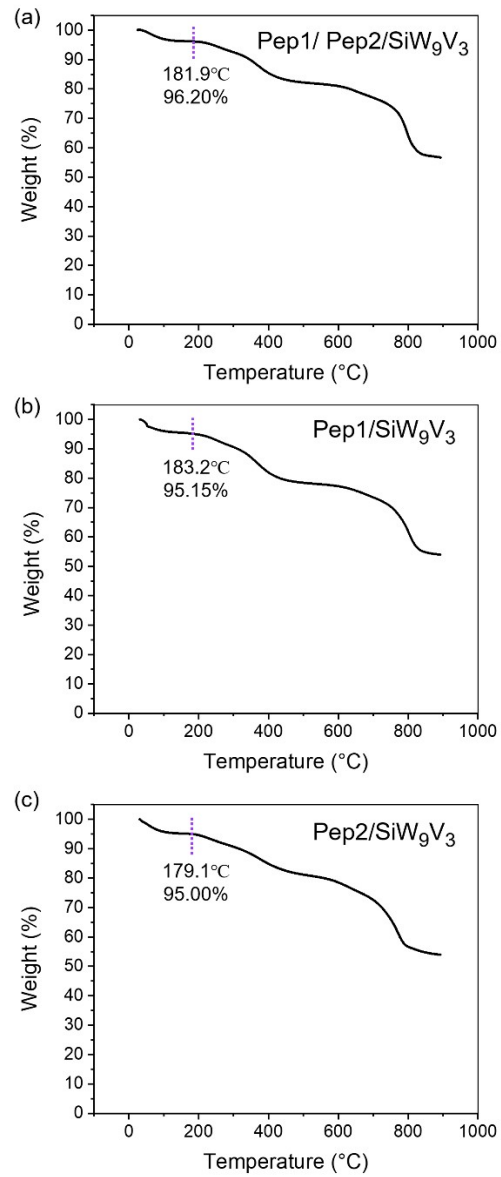

**Fig. S5** TGA curves of the lyophilized Pep1/Pep2/SiW<sub>9</sub>V<sub>3</sub> adhesive (a), Pep1/SiW<sub>9</sub>V<sub>3</sub> solid (b) and Pep2/SiW<sub>9</sub>V<sub>3</sub> coacervate (c).

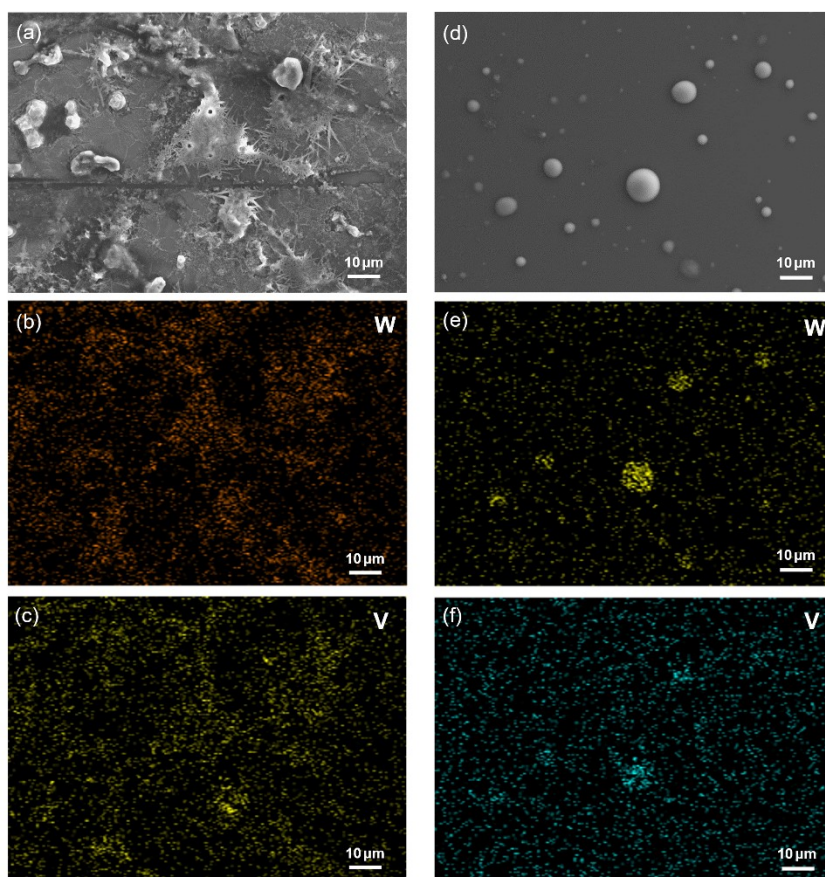

**Fig. S6** FE-SEM (a, d) and EDS (b, e for tungsten element, and c, f for vanadium element) images of the lyophilized Pep1/SiW<sub>9</sub>V<sub>3</sub> solid sample (a-c) and the lyophilized Pep2/SiW<sub>9</sub>V<sub>3</sub> coacervate sample (d-f).

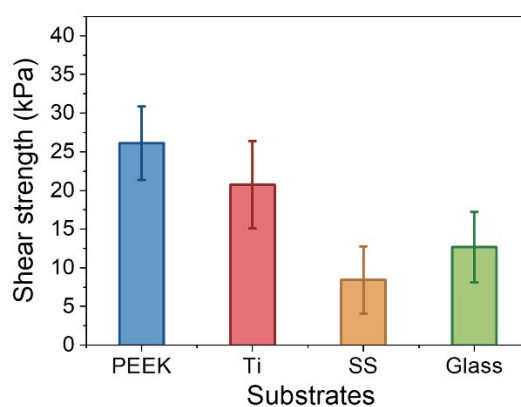

**Fig. S7** The average shear adhesion strengths of Pep1/Pep2/SiW<sub>9</sub>V<sub>3</sub> adhesive on various substrates at 37 °C.

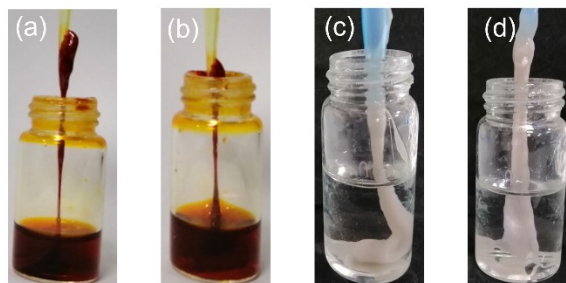

**Fig. S8** Photographs of adhesives formed by different dual peptides and POMs: (a) Pep1/Pep3/SiW<sub>9</sub>V<sub>3</sub>; (b) Pep1/Pep4/SiW<sub>9</sub>V<sub>3</sub>; (c) Pep1/Pep2/PW<sub>9</sub> and (d) Pep1/Pep2/EuPW<sub>11</sub>.

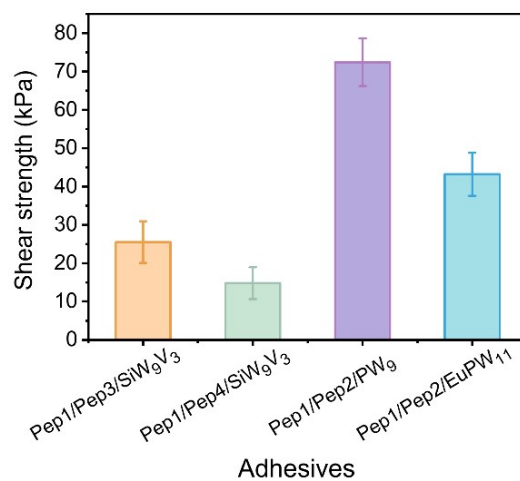

**Fig. S9** Average shear adhesion strengths of the different dual peptides/POM adhesive against Ti substrates.
